# Supplementary material for: GP64-pseudotyped lentiviral vectors target liver endothelial cells and correct hemophilia A mice
Source: PubMed Central journal article supplement (PMC11178766; doi:10.1038/s44321-024-00072-8), 2024-04-29
Supplement: 44321_2024_72_MOESM1_ESM.pdf [file 44321_2024_72_MOESM1_ESM.pdf]

## **GP64-pseudotyped lentiviral vectors target liver endothelial cells and correct hemophilia**

### **A mice**

Michela Milani<sup>1</sup>, Cesare Canepari<sup>1,2</sup>, Simone Assanelli<sup>3</sup>, Simone Merlin<sup>3</sup>, Ester Borroni<sup>3</sup>, Francesco Starinieri<sup>1</sup>, Mauro Biffi<sup>1</sup>, Fabio Russo<sup>1</sup>, Anna Fabiano<sup>1</sup>, Desirée Zambroni<sup>4</sup>, Andrea Annoni<sup>1</sup>, Luigi Naldini<sup>1,2</sup>, Antonia Follenzi<sup>3</sup>, Alessio Cantore<sup>1,2</sup>

<sup>1</sup>San Raffaele Telethon Institute for Gene Therapy, IRCCS San Raffaele Scientific Institute, Milan, Italy

<sup>2</sup>Vita-Salute San Raffaele University, Milan, Italy

<sup>3</sup>Department of Health Sciences, University of Piemonte Orientale, Novara, Italy.

<sup>4</sup>IRCCS San Raffaele Scientific Institute, Milan, Italy

## Appendix

### Table of content:

|                                    |   |
|------------------------------------|---|
| Appendix Figure S1 and legend..... | 2 |
| Appendix Figure S2 and legend..... | 3 |

### Appendix Figure S1

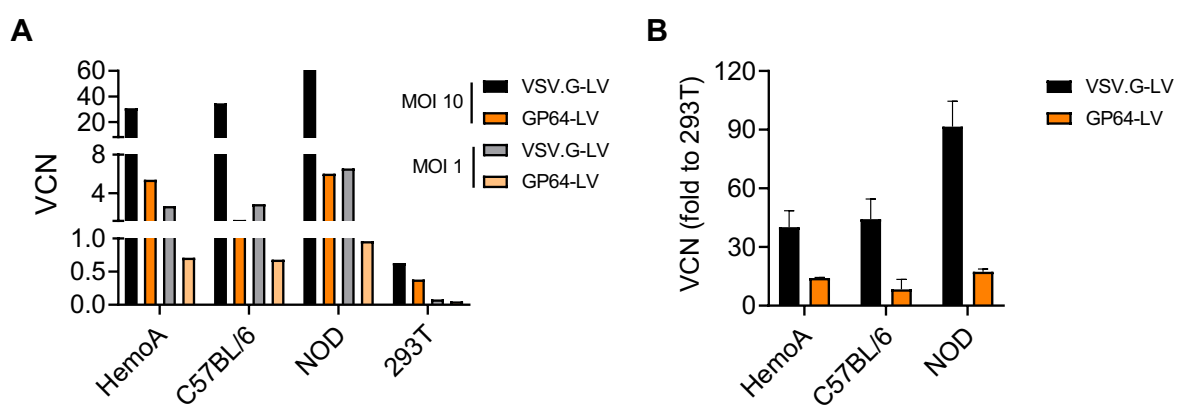

### Appendix Figure S1. *Ex vivo* transduction of primary murine hepatocytes

- VCN of primary murine hepatocytes of the indicated strains transduced with VSV.G-LV or GP64-LV at the indicated MOI. Doses have been matched based on LV titers measured on 293T cells.
- Mean and SEM of normalized VCN values over 293T of VCN shown in A (n=2).

## Appendix Figure S2

**A**

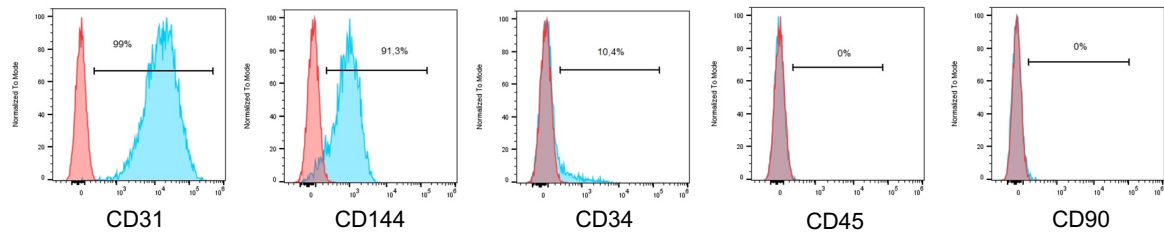

**B**

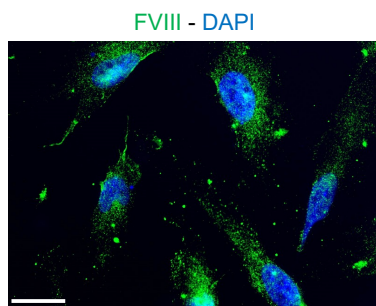

### Appendix Figure S2. Characterization of immortalized LSEC

- A. Flow cytometry histograms showing the expression of CD31, CD144, CD34, CD45, and CD90 in primary human immortalized LSEC.
- B. Anti-human FVIII immunofluorescence image of primary human immortalized LSEC. Green: FVIII. Blue: DAPI (nuclei). Scale bar: 25 $\mu$ m.
